# Supplementary material
Source: ML conference proceedings conference paper supplement (https://proceedings.mlr.press/v32/chene14.html)
Supplement: Supplementary file 1 [file chene14-supp.pdf]

# Supplementary Materials for “Statistical-Computational Phase Transitions in Planted Models: The High-Dimensional Setting”

Yudong Chen

Jiaming Xu

The University of California, Berkeley

University of Illinois at Urbana-Champaign

yudong.chen@eecs.berkeley.edu

jxu18@illinois.edu

## Abstract

We provide the proofs for the theorems in the main paper.

## 1 Proofs for Planted Clustering

In this section, Theorems 1–6 refer to the theorems in the main paper. Equations are numbered continuously from the main paper. We let  $n_1 := rK$  and  $n_2 := n - rK$  be the numbers of non-isolated and isolated nodes, respectively.

### 1.1 Proof of Theorem 1

The proof relies on information theoretical arguments and the Fano’s inequality [4]. We use  $D(\text{Ber}(p)\|\text{Ber}(q))$  to denote the KL divergence between two Bernoulli distributions with mean  $p$  and  $q$ . We first state an upper bound on  $D(\text{Ber}(p)\|\text{Ber}(q))$ , which is used later in the proof:

$$D(\text{Ber}(p)\|\text{Ber}(q)) = p \log \frac{p}{q} + (1-p) \log \frac{1-p}{1-q} \stackrel{(a)}{\leq} p \frac{p-q}{q} + (1-p) \frac{q-p}{1-q} = \frac{(p-q)^2}{q(1-q)}, \quad (16)$$

where (a) follows from the inequality  $\log x \leq x - 1, \forall x \geq 0$ . Let  $\mathbb{P}_{(Y^*, A)}$  be the joint distribution of  $Y^*$  and  $A$  when  $Y^*$  is sampled from  $\mathcal{Y}$  uniformly at random and  $A$  is generated according to the planted clustering model. Because the supremum is lower bounded by the average, we have

$$\inf_{\hat{Y}} \sup_{Y^* \in \mathcal{Y}} \mathbb{P}[\hat{Y} \neq Y^*] \geq \inf_{\hat{Y}} \mathbb{P}_{(Y^*, A)}[\hat{Y} \neq Y^*]. \quad (17)$$

Let  $H(X)$  be the entropy of a random variable  $X$  and  $I(X; Z)$  the mutual information between  $X$  and  $Z$ . By Fano’s inequality, we have for any  $\hat{Y}$ ,

$$\mathbb{P}_{(Y^*, A)}(\hat{Y} \neq Y^*) \geq 1 - \frac{I(Y^*; A) + 1}{\log |\mathcal{Y}|}. \quad (18)$$

Simple counting gives that  $|\mathcal{Y}| = \binom{n}{n_1} \frac{n_1!}{r!(K!)^r}$ . Note that  $\binom{n}{n_1} \geq (\frac{n}{n_1})^{n_1}$  and  $\sqrt{n}(\frac{n}{e})^n \leq n! \leq e\sqrt{n}(\frac{n}{e})^n$ . It follows that

$$|\mathcal{Y}| \geq (n/n_1)^{n_1} \frac{\sqrt{n_1}(n_1/e)^{n_1}}{e\sqrt{r}(r/e)^r e^r K^{r/2}(K/e)^{n_1}} \geq \left(\frac{n}{K}\right)^{n_1} \frac{1}{e(r\sqrt{K})^r}.$$

This implies  $\log |\mathcal{Y}| \geq \frac{1}{2}n_1 \log \frac{n}{K}$  under the assumption that  $8 \leq K \leq n/2$  and  $n \geq 32$ . On the other hand, note that  $H(A) \leq \binom{n}{2}H(A_{12})$  because the  $A_{ij}$ 's are identically distributed by symmetry. Furthermore, the  $A_{ij}$ 's are independent conditioned on  $Y^*$ , so  $H(A|Y^*) = \binom{n}{2}H(A_{12}|Y_{12}^*)$ . It follows that  $I(Y^*; A) = H(A) - H(A|Y^*) \leq \binom{n}{2}I(Y_{12}^*; A_{12})$ . We bound  $I(Y_{12}^*; A_{12})$  below. Observe that

$$\mathbb{P}(Y_{12}^* = 1) = \frac{\binom{n-2}{K-2} \binom{n-K}{K} \cdots \binom{n-rK+K}{K} \frac{1}{(r-1)!}}{|\mathcal{Y}|} = \alpha := \frac{K}{n},$$

and thus  $\mathbb{P}(A_{12} = 1) = \beta := \alpha p + (1 - \alpha)q$ . It follows that

$$\begin{aligned} I(Y_{12}^*; A_{12}) &= \alpha D(\text{Ber}(p) \parallel \text{Ber}(\beta)) + (1 - \alpha)D(\text{Ber}(q) \parallel \text{Ber}(\beta)) \\ &\stackrel{(a)}{\leq} \alpha \frac{(p - \beta)^2}{\beta(1 - \beta)} + (1 - \alpha)q \frac{(q - \beta)^2}{\beta(1 - \beta)} \\ &= \frac{\alpha(1 - \alpha)(p - q)^2}{\beta(1 - \beta)} \stackrel{(b)}{\leq} \frac{\alpha(p - q)^2}{q(1 - q)}, \end{aligned}$$

where (a) follows from (16) and (b) follows because  $\beta(1 - \beta) \geq \alpha p(1 - p) + (1 - \alpha)q(1 - q)$  due to the concavity of  $x(1 - x)$ . Hence we have  $I(Y^*; A) \leq \frac{n_1(K-1)(p-q)^2}{2q(1-q)}$ . Combining with (18), we obtain

$$\mathbb{P}_{(Y^*, A)}(Y \neq Y^*) \geq 1 - \frac{\frac{n_1(K-1)(p-q)^2}{q(1-q)} + 2}{n_1 \log \frac{n}{K}} \geq 3/4 - \frac{(K-1)(p-q)^2}{q(1-q) \log \frac{n}{K}}, \quad (19)$$

where the last inequality holds because  $n_1 \log \frac{n}{K} \geq 8$  when  $K \geq n/2$  and  $n \geq 32$ . The RHS above is at least  $1/2$  when the first condition (1) in the theorem holds. Substituting into (17) proves sufficiency of (1).

We now turn to the third condition (3). Since  $p > q$ , we have  $\beta \leq p$  by the definition of  $\beta$ . Moreover,  $\beta \geq \alpha p$  and  $1 - \beta = 1 - q - \alpha(p - q) \geq (1 - \alpha)(1 - q)$ . It follows that

$$\begin{aligned} I(Y_{12}^*; A_{12}) &= \alpha p \log \frac{p}{\beta} + \alpha(1 - p) \log \frac{(1 - p)}{1 - \beta} + (1 - \alpha)D(\text{Ber}(q) \parallel \text{Ber}(\beta)) \\ &\leq \alpha p \log \frac{1}{\alpha} + (1 - \alpha) \frac{(q - \beta)^2}{\beta(1 - \beta)} = \alpha p \log \frac{1}{\alpha} + \frac{\alpha^2(1 - \alpha)(p - q)^2}{\beta(1 - \beta)} \\ &\leq \alpha p \log \frac{1}{\alpha} + \frac{\alpha(p - q)^2}{p(1 - q)} \leq \alpha p \log \frac{e}{\alpha}. \end{aligned}$$

where the first inequality follows from  $p/\beta \leq 1/\alpha$ ,  $1 - \beta \geq 1 - p$  and (16), the second inequality follows from  $\beta(1 - \beta) \geq \alpha(1 - \alpha)p(1 - q)$ , and the last inequality follows from  $p - q \leq p(1 - q)$ . By the definition of  $\alpha$ , we have  $\alpha \geq \frac{K(K-1)}{n(n-1)} \geq \frac{K}{en}$  when  $K \geq 8$ . It follows that  $I(Y_{12}^*; A_{12}) \leq \alpha p \log \frac{e^2 n}{K}$ , and thus  $I(Y^*; A) \leq \frac{1}{2}n_1 K p \log \frac{e^2 n}{K}$ . By equation (19), if  $Kp \leq \frac{1}{16}$ , i.e., the condition (3) in the theorem holds, then  $\mathbb{P}(Y \neq Y^*) \geq 1/2$ .

It remains to prove the sufficiency of the second condition (3). Let  $\bar{M} = n - K$  and  $\bar{\mathcal{Y}} = \{Y_0, Y_1, \dots, Y_{\bar{M}}\}$  be a subset of  $\mathcal{Y}$  with cardinality  $\bar{M} + 1$ , which is specified later. Let  $\mathbb{P}_{(Y^*, A)}$  denote the joint distribution of  $Y^*$  and  $A$  when  $Y^*$  is sampled from  $\bar{\mathcal{Y}}$  uniformly at random and then  $A$  is generated according to the planted clustering model. By Fano's inequality, we have

$$\inf_{\hat{Y}} \sup_{Y^* \in \bar{\mathcal{Y}}} \mathbb{P}[\hat{Y} \neq Y^*] \geq \inf_{\hat{Y}} \bar{\mathbb{P}}_{(Y^*, A)}[\hat{Y} \neq Y^*] \geq \inf_{\hat{Y}} \left\{ 1 - \frac{I(Y^*; A) + 1}{\log |\hat{\mathcal{Y}}|} \right\}. \quad (20)$$

We construct  $\bar{\mathcal{Y}}$  as follows. Let  $Y_0$  be the clustering matrix such that the clusters  $\{C_l\}_{l=1}^r$  are given by  $C_l = \{(l-1)K+1, \dots, lK\}$ . Informally, each  $Y_i$  with  $i \geq 1$  is obtained from  $Y_0$  by swapping two nodes in two different clusters. More specifically, for each  $i \in [\bar{M}]$ , (i) if the  $(K+i)$ -th node belongs to cluster  $C_l$  for some  $l$ , then  $Y_i$  has the first right cluster as  $\{1, 2, \dots, K-1, K+i\}$  and the  $l$ -th right cluster as  $D_l \setminus \{K+i\} \cup \{K\}$ , and all the other clusters identical to  $Y_0$ ; (ii) if the  $(K+i)$ -th node is an isolated node in  $Y_0$ , then  $Y_i$  has the first right cluster as  $\{1, 2, \dots, K-1, K+i\}$  and node  $K$  as an isolated node, and all the other clusters identical to  $Y_0$ .

Let  $\mathbb{P}_i$  be the distribution of the graph  $A$  conditioned on  $Y^* = Y_i$ . Note that each  $\mathbb{P}_i$  is a product of  $\frac{1}{2}n(n-1)$  Bernoulli distributions. We have the following chain of inequalities:

$$\begin{aligned} I(Y^*; A) &\stackrel{(a)}{\leq} \frac{1}{(M+1)^2} \sum_{i,i'=0}^M D(\mathbb{P}_i \|\mathbb{P}_{i'}) \\ &\leq \max_{i,i'=0,\dots,M} D(\mathbb{P}_i \|\mathbb{P}_{i'}) \\ &\stackrel{(b)}{\leq} 3KD(\text{Ber}(p) \|\text{Ber}(q)) + 3KD(\text{Ber}(q) \|\text{Ber}(p)) \\ &\stackrel{(c)}{\leq} 3K(p-q)^2 \frac{1}{\min\{p(1-p), q(1-q)\}} \end{aligned}$$

where (a) follows from the convexity of KL divergence, (b) follows by our construction of  $\{Y_i\}$ , and (c) follows from (16). If (2) holds, then  $I(Y; A) \leq \frac{1}{4} \log(n-K) = \frac{1}{4} \log |\bar{\mathcal{Y}}|$ . Since  $\log(n-K) \geq \log(n/2) \geq 4$  if  $n \geq 128$ , it follows from (20) that the minimax error probability is at least  $1/2$ .

## 1.2 Proof of Theorem 2

Let  $\langle X, Y \rangle := \text{Tr}(X^\top Y)$  denote the inner product between two matrices. Assume that  $p > q$  first. For any feasible solution  $Y \in \mathcal{Y}$  of (4), we define  $\Delta(Y) := \langle A, Y^* - Y \rangle$ . To prove the theorem, it suffices to show that  $\Delta(Y) > 0$  for all feasible  $Y$  with  $Y \neq Y^*$ . For simplicity, in this proof we use a different convention that  $Y_{ii}^* = 0$  and  $Y_{ii} = 0$  for all  $i \in V$ . Note that

$$\Delta(Y) = \langle \mathbb{E}[A], Y^* - Y \rangle + \langle A - \mathbb{E}[A], Y^* - Y \rangle, \quad (21)$$

where  $\mathbb{E}[A] = q\mathbf{1}\mathbf{1}^\top + (p-q)Y^* - q\mathbf{I}$ ,  $\mathbf{1}$  is the all one vector in  $\mathbb{R}^\times$  and  $\mathbf{I}$  is the  $n \times n$  identity matrix. Let  $d(Y) := \langle Y^*, Y^* - Y \rangle$ ; since  $\sum_{i,j} Y_{ij} = \sum_{i,j} Y_{ij}^*$ , we have

$$\langle \mathbb{E}[A], Y^* - Y \rangle = (p-q)d(Y). \quad (22)$$

On the other hand, observe that

$$\langle A - \mathbb{E}[A], Y^* - Y \rangle = 2 \underbrace{\sum_{(i<j): \substack{Y_{ij}^*=1 \\ Y_{ij}=0}} (A_{ij} - p)}_{T_1(Y)} - 2 \underbrace{\sum_{(i<j): \substack{Y_{ij}^*=0 \\ Y_{ij}=1}} (A_{ij} - q)}_{T_2(Y)}.$$

Here  $T_1(Y)$  ( $T_2(Y)$ , resp.) is the sum of  $\frac{1}{2}d(Y)$  i.i.d. centered Bernoulli random variables with parameter  $p$  ( $q$ , resp.). Let  $\delta_1 = (p-q)/(2p)$  and  $\delta_2 = (p-q)/(2q)$ . By the Bernstein inequality, we have for each fix  $Y \in \mathcal{Y}$ ,

$$\begin{aligned} \mathbb{P} \left\{ T_1(Y) \leq -\frac{\delta_1}{2} d(Y)p \right\} &\leq \exp \left( -\frac{\delta_1^2}{4(1-p) + 4\delta_1/3} d(Y)p \right) \stackrel{(a)}{\leq} \exp \left( -\frac{(p-q)^2}{20p(1-q)} d(Y) \right), \\ \mathbb{P} \left\{ T_2(Y) \geq \frac{\delta_2}{2} d(Y)q \right\} &\leq \exp \left( -\frac{\delta_2^2}{4(1-q) + 4\delta_2/3} d(Y)q \right) \stackrel{(b)}{\leq} \exp \left( -\frac{(p-q)^2}{20p(1-q)} d(Y) \right), \end{aligned}$$

where (a) and (b) hold because  $p > q$  and  $p - q \leq p(1 - q)$ . It follows from the union bound that

$$\mathbb{P} \left\{ \frac{1}{2} \langle A - \mathbb{E}[A], Y^* - Y \rangle = T_1(Y) - T_2(Y) \leq -\frac{1}{2}(p - q)d(Y) \right\} \leq 2 \exp \left( -\frac{(p - q)^2}{20p(1 - q)} d(Y) \right).$$

This implies

$$\mathbb{P} \{ \Delta(Y) \leq 0 \} \leq 2 \exp \left( -\frac{(p - q)^2}{20p(1 - q)} d(Y) \right) \quad (23)$$

in view of (21) and (22). This bound holds for each fixed  $Y \in \mathcal{Y}$ .

We prove to bound the probability of the event  $\{\exists Y \in \mathcal{Y} : Y \neq Y^*, \Delta(Y) \leq 0\}$ . Note that  $2(K - 1) \leq d(Y) \leq rK^2$  for any feasible  $Y \neq Y^*$ , where the lower bound is achieved by swapping a node in  $V_1$  with a node in  $V_2$ , and the upper bound follows from  $\sum_{i,j} Y_{ij}^* \leq rK^2$ . The key step is to upper-bound the cardinality of the set  $\{Y \in \mathcal{Y} : d(Y) = t\}$  for each  $t$ . This is done in the following combinatorial lemma.

**Lemma 1.1.** *For each  $t \in [2(K - 1), rK^2]$ , we have*

$$|\{Y \in \mathcal{Y} : d(Y) = t\}| \leq \frac{25t^2}{K^2} n^{20t/K}. \quad (24)$$

We prove the lemma in Section 1.2.1. Combining the lemma with (23) and the union bound, we obtain

$$\begin{aligned} & \mathbb{P} \{ \exists Y \in \mathcal{Y} : Y \neq Y^*, \Delta(Y) \leq 0 \} \\ & \leq \sum_{t=2K-2}^{rK^2} \mathbb{P} \{ \exists Y \in \mathcal{Y} : d(Y) = t, \Delta(Y) \leq 0 \} \\ & \leq 2 \sum_{t=2K-2}^{rK^2} |\{ \exists Y \in \mathcal{Y} : d(Y) = t \}| \exp \left( -\frac{(p - q)^2 t}{20p(1 - q)} \right) \\ & \leq 2 \sum_{t=2K-2}^{rK^2} \frac{25t^2}{K^2} n^{20t/K} \exp \left( -\frac{(p - q)^2 t}{20p(1 - q)} \right) \\ & \stackrel{(a)}{\leq} 50 \sum_{t=2K-2}^{rK^2} n^2 n^{-5t/K} \\ & \leq 50rK^2 n^{-3} \leq 50n^{-1}, \end{aligned}$$

where (a) follows from the assumption that  $(p - q)^2 K \geq C' p(1 - q) \log n$  for a large constant  $C'$ . This means  $Y^*$  is the unique optimal solution with high probability. A similar argument applies to the case with  $q > p$ . This completes the proof of the theorem.

### 1.2.1 Proof of Lemma 1.1

Recall that  $C_1^*, \dots, C_r^*$  are the true clusters associated with  $Y^*$ . Fix a  $Y \in \mathcal{Y}$  with  $d(Y) = t$ . The cluster matrix  $Y$  defines a new ordered partition  $(C_1, \dots, C_{r+1})$  of  $V$  according to the following procedure.

1. Let  $C_{r+1} := \{i : Y_{ij} = 0, \forall j\}$ .

2. The nodes in  $V \setminus C_{r+1}$  can be further partitioned into  $r$  new clusters of size  $K$ , where nodes  $i$  and  $j$  are in the same cluster if and only if  $Y_{ij} = 1$ ; we define an ordering  $C_1, \dots, C_r$  of these  $r$  new clusters as follows.

- (a) For each new cluster  $C$ , if there exists a  $k \in [r]$  such that  $|C \cap C_k^*| > K/2$ , then we label this new cluster as  $C_k$ ; this label is unique because the cluster size is  $K$ .
- (b) The remaining clusters are labeled arbitrarily.

This new partition has the following properties:

- (A0)  $(C_1, \dots, C_r, C_{r+1})$  is a partition of  $V$ , and  $|C_k| = K$  for all  $k \in [r]$ .
- (A1) For every  $k \in [r]$ , either  $|C_k \cap C_k^*| > K/2$ , or  $|C_{k'} \cap C_k^*| \leq K/2$  for all  $k' \in [r]$ ;
- (A2) We have

$$\sum_{k=1}^r \left( |C_k^* \cap C_{r+1}|^2 - |C_k^* \cap C_{r+1}| + \sum_{\substack{k', k'' \in [r+1] \\ k' \neq k''}} |C_k^* \cap C_{k'}| |C_k^* \cap C_{k''}| \right) = t.$$

Here, Properties (A0) and (A1) are direct consequences of how we label the new clusters, and Property (A2) follows from the following equalities

$$\begin{aligned} t &= d(Y) = |\{(i, j) \in V \times V : Y_{ij}^* = 1, Y_{ij} = 0\}| \\ &= \sum_{k=1}^r |\{(i, j) : (i, j) \in C_k^* \times C_k^*, i \neq j, Y_{ij} = 0\}| \\ &= \sum_{k=1}^r |\{(i, j) : (i, j) \in C_k^* \times C_k^*, i \neq j, (i, j) \in C_{r+1} \times C_{r+1}\}| \\ &\quad + \sum_{k=1}^r \sum_{\substack{k', k'' \in [r+1] \\ k' \neq k''}} |\{(i, j) : (i, j) \in C_k^* \times C_k^*, (i, j) \in C_{k'} \times C_{k''}\}|. \end{aligned}$$

Since these properties are satisfied by any  $Y$  with  $d(Y) = t$ , we have

$$|\{Y \in \mathcal{Y} : d(Y) = t\}| \leq |\{(C_1, \dots, C_r, C_{r+1}) : \text{it has properties (A0)–(A2)}\}|. \quad (25)$$

To prove the lemma, it suffices to upper bound the right hand side of (25).

Fix an ordered partition  $\mathcal{C} := (C_1, \dots, C_r, C_{r+1})$  with properties (A0)–(A2). We consider the first true cluster,  $C_1^*$ . Define  $m_1 := \sum_{k' \in [r+1], k' \neq 1} |C_{k'} \cap C_1^*|$ , which is the number of nodes in  $C_1^*$  that are misclassified by  $\mathcal{C}$ . We consider two cases.

- If  $|C_1 \cap C_1^*| > K/10$ , then

$$\sum_{\substack{k', k'' \in [r+1] \\ k' \neq k''}} |C_1^* \cap C_{k'}| |C_1^* \cap C_{k''}| \geq 2|C_1^* \cap C_1| \sum_{\substack{k'' \in [r+1] \\ k'' \neq 1}} |C_1^* \cap C_{k''}| > m_1 K/5.$$

- If  $|C_1 \cap C_1^*| \leq K/10$ , then by condition (A1) we must have  $|C_{k'} \cap C_1^*| \leq K/2$  for all  $1 \leq k' \leq r$

and  $m_1 > 9K/10$ . Hence,

$$\begin{aligned}
& \sum_{\substack{k', k'' \in [r+1] \\ k' \neq k''}} |C_1^* \cap C_{k'}| |C_1^* \cap C_{k''}| + |C_1^* \cap C_{r+1}|^2 - |C_1^* \cap C_{r+1}| \\
& \geq \sum_{\substack{k', k'' \in [r+1] \\ k' \neq k''}} \mathbb{I}_{\{k' \neq 1\}} \mathbb{I}_{\{k'' \neq 1\}} |C_{k'} \cap C_1^*| |C_{k''} \cap C_1^*| + |C_1^* \cap C_{r+1}|^2 - |C_1^* \cap C_{r+1}| \\
& = m_1^2 - \sum_{2 \leq k' \leq r} |C_{k'} \cap C_1^*|^2 - |C_1^* \cap C_{r+1}| \\
& \geq m_1^2 - \frac{1}{2} K m_1 \geq \frac{2}{5} m_1 K.
\end{aligned}$$

We conclude that we always have

$$\sum_{\substack{k', k'' \in [r+1] \\ k' \neq k''}} |C_1^* \cap C_{k'}| |C_1^* \cap C_{k''}| + |C_1^* \cap C_{r+1}|^2 - |C_1^* \cap C_{r+1}| \geq \frac{1}{5} m_1 K.$$

The above inequality holds if we replace  $C_1^*$  by  $C_k^*$  and  $m_1$  by  $m_k$  (defined similarly) for each  $k \in [r]$ . It follows that

$$\sum_{k=1}^r \left( |C_k^* \cap C_{r+1}|^2 - |C_k^* \cap C_{r+1}| + \sum_{\substack{k', k'' \in [r+1] \\ k' \neq k''}} |C_k^* \cap C_{k'}| |C_k^* \cap C_{k''}| \right) \geq \frac{K}{5} \sum_{k=1}^r m_k.$$

Thus by Property (A2), we have  $\sum_{k \in [r]} m_k \leq 5t/K$ , i.e., the total number of misclassified nodes in  $V_1$  is upper bounded by  $5t/K$ . This means that the total number of misclassified nodes in  $V_2$  is also upper bounded by  $5t/K$  because by our cluster size constraint, one misclassified node in  $V_2$  must produce one misclassified node in  $V_1$ . Therefore, the total number of misclassified nodes in  $V_1$  can at most take  $5t/K$  different values and the same is true for the total number of misclassified nodes in  $V_2$ . For a fixed number of misclassified nodes in  $V_1$  and  $V_2$ , there are at most  $n_1^{5t/K} n_2^{5t/K}$  different ways to choose these misclassified nodes. Each misclassified node in  $V_1$  can be assigned to one of  $r - 1$  different clusters or leave isolated, and each misclassified node in  $V_2$  can be assigned to one of  $r$  different clusters. Hence, the right hand side of (25) is upper bounded by  $\frac{25t^2}{K^2} n_1^{5t/K} n_2^{5t/K} r^{10t/K} \leq \frac{25t^2}{K^2} n^{20t/K}$ , which proves the lemma.

### 1.3 Proof of Theorem 3

The proof uses several matrix norms. The spectral norm  $\|X\|$  of a matrix  $X$  is the largest singular value of  $X$ . The nuclear norm  $\|X\|_*$  is the sum of singular values. We also need the  $L_1$  norm  $\|X\|_1 = \sum_{i,j} |X_{ij}|$  and the  $L_\infty$  norm  $\|X\|_\infty = \max_{i,j} |X_{ij}|$ . Let  $\langle X, Y \rangle = \text{Tr}(X^\top Y)$  denote the inner product between two matrices. For a vector  $x$ ,  $\|x\|_2$  is the usual Euclidean norm.

Define  $\Delta(Y) = \langle Y^* - Y, A \rangle$ . It suffices to show that  $\Delta(Y) > 0$  for all feasible solution  $Y$  of the program (6)–(8) with  $Y \neq Y^*$ . Rewrite  $\Delta(Y)$  as

$$\Delta(Y) = \langle \bar{A}, Y^* - Y \rangle + \langle A - \bar{A}, Y^* - Y \rangle = \langle \bar{A}, Y^* - Y \rangle + \lambda \langle W, Y^* - Y \rangle, \quad (26)$$

where  $\bar{A} = q\mathbf{1}\mathbf{1}^\top + (p - q)Y^*$  and  $W := (A - \bar{A})/\lambda$ . Because  $\sum_{i,j} Y_{ij} = rK^2 = \sum_{i,j} Y_{ij}^*$  and  $Y_{ij} \in [0, 1]$ , the first term in the RHS of (26) satisfies

$$\langle \bar{A}, Y^* - Y \rangle = (p - q)\langle Y^*, Y^* - Y \rangle = \frac{p - q}{2} \|Y^* - Y\|_1.$$

We now control the second term in (26). Note that  $\text{Var}[A_{ij}] \leq p(1 - q)$ . Define  $\sigma^2 := \max\{p(1 - q), q(1 - p)\}$ . Note that  $\|\bar{A} - \mathbb{E}[A]\| \leq 1$ . By assumption,  $\sigma^2 \geq C' \log n / K$  for a constant  $C'$ . We need the following bound, which is proved in Section 1.3.1 to follow.

**Lemma 1.2.** *Under the notation above, if  $\sigma^2 \geq C' \log n / K$  for a constant  $C'$ , then there exists a constant  $C$  such that with high probability  $\|A - \mathbb{E}[A]\| \leq C \sqrt{\sigma^2 K \log n + q(1 - q)n}$ .*

It follows that with high probability

$$\|A - \bar{A}\| \leq \|A - \mathbb{E}[A]\| + \|\bar{A} - \mathbb{E}[A]\| \leq C \sqrt{\sigma^2 K \log n + q(1 - q)n}$$

for a universal constant  $C$ . Define  $\lambda := C \sqrt{\sigma K \log n + q(1 - q)n}$  and the normalized noise matrix  $W$ . Thus w.h.p.  $\|W\| \leq 1$ .

Let  $u_k$  be the normalized characteristic vector of cluster  $C_k^*$ , i.e.,  $u_k(i) = 1/\sqrt{K}$  if node  $i$  is in cluster  $C_k^*$  and  $u_k(i) = 0$  otherwise. Let  $U = [u_1, \dots, u_r]$ . Then  $Y^* = KU U^\top$  is the singular value decomposition of  $Y^*$ . Define the projections  $\mathcal{P}_T(M) = UU^\top M + MU U^\top - UU^\top M U U^\top$  and  $\mathcal{P}_{T^\perp}(M) = M - \mathcal{P}_T(M)$ . Because  $\|\mathcal{P}_{T^\perp}(W)\| \leq \|W\| \leq 1$  w.h.p.,  $UU^\top + \mathcal{P}_{T^\perp}(W)$  is a subgradient of  $\|X\|_*$  at  $X = Y^*$ . Since  $\|Y^*\|_* = n_1$ , it follows that for any feasible  $Y$ ,

$$0 \geq \|Y\|_* - \|Y^*\|_* \geq \langle UU^\top + \mathcal{P}_{T^\perp}(W), Y - Y^* \rangle.$$

Substituting into (26), we obtain that for any feasible  $Y$ ,

$$\begin{aligned} \Delta(Y) &\geq \frac{p - q}{2} \|Y^* - Y\|_1 + \lambda \langle \mathcal{P}_T(W) - UU^\top, Y^* - Y \rangle \\ &\geq \left( \frac{p - q}{2} - \lambda \|UU^\top\|_\infty - \|\mathcal{P}_T(\lambda W)\|_\infty \right) \|Y^* - Y\|_1 \\ &= \left( \frac{p - q}{2} - \frac{\lambda}{K} - \|\mathcal{P}_T(\lambda W)\|_\infty \right) \|Y^* - Y\|_1, \end{aligned} \tag{27}$$

where the last equality holds because  $\|UU^\top\|_\infty = 1/K$ .

We proceed by bounding the term  $\|\mathcal{P}_T(\lambda W)\|_\infty$  in (27). From the definition of  $\mathcal{P}_T$ , we have

$$\|\mathcal{P}_T(\lambda W)\|_\infty \leq \|UU^\top(\lambda W)\|_\infty + \|(\lambda W)UU^\top\|_\infty + \|UU^\top(\lambda W)UU^\top\|_\infty \leq 3\|UU^\top(\lambda W)\|_\infty.$$

Assume node  $i$  belongs to cluster  $k$ . Then

$$(UU^\top(\lambda W))_{ij} = (u_k u_k^\top(\lambda W))_{ij} = (1/K) \sum_{i' \in C_k^*} (\lambda W)_{i'j},$$

which is the average of  $K$  independent random variables. By Bernstein's inequality (Theorem A.1) we have with probability at least  $1 - n^{-4}$ ,

$$\left| \sum_{i' \in C_k^*} (\lambda W)_{i'j} \right| \leq \sqrt{6\sigma^2 K \log n} + 2 \log n \leq C_1 \sigma \sqrt{K \log n},$$

for some constant  $C_1$ , where the last inequality follows from the assumption (9). It follows from the union bound over all  $(i, j)$  that  $\|\mathcal{P}_T(\lambda W)\|_\infty \leq 3\|UU^\top(\lambda W)\|_\infty \leq 3C_1 \sigma \sqrt{\log n / K}$  with probability at least  $1 - n^{-2}$ . Substituting back to (27), we conclude that with probability at least  $1 - n^{-1}$ ,

$$\Delta(Y) \geq \left( \frac{p - q}{2} - \frac{\lambda}{K} - 3C_1 \sigma \sqrt{\log n / K} \right) \|Y^* - Y\|_1 > 0$$

for all feasible  $Y \neq Y^*$ , where the last inequality follows from the assumption (9).

### 1.3.1 Proof of Lemma 1.2

Let  $R := \text{support}(Y^*)$  and  $\mathcal{P}_R(\cdot) : \mathbb{R}^{n \times n} \rightarrow \mathbb{R}^{n \times n}$  be the operator which sets the entries outside of  $R$  to be zero. Let  $B_1 = \mathcal{P}_R(A - \mathbb{E}[A])$  and  $B_2 = A - \mathbb{E}[A] - B_1$ . Then  $B_1$  is a block-diagonal matrix with  $r$  blocks of size  $K \times K$  and has entries with variance bounded by  $\sigma^2$ . Applying the matrix Bernstein inequality [5], we get that with high probability,  $\|B_1\| \leq c_1 \sqrt{\sigma^2 K \log n}$  for a constant  $c_1$ . On the other hand,  $B_2$  has entries with variance bounded by  $\max\{q(1-q), c_2 \log n/n\}$  for a constant  $c_2$ . By Lemma 1.3 below, we obtain that  $\|B_2\| \leq c_3 \max\{\sqrt{q(1-q)n}, \sqrt{\log n}\}$  for a constant  $c_3$ . It follows that

$$\begin{aligned} \|A - \mathbb{E}[A]\| &\leq \|B_1\| + \|B_2\| \leq c_1 \sqrt{\sigma^2 K \log n} + c_3 \max\{\sqrt{q(1-q)n}, \sqrt{\log n}\} \\ &\leq C \sqrt{\sigma^2 K \log n + q(1-q)n}, \end{aligned}$$

which completes the proof of the lemma.

**Lemma 1.3.** *Let  $M$  denote the  $n \times n$  symmetric matrix such that  $M_{ij}$  ( $1 \leq i < j \leq n$ ) are independent random variables with  $\mathbb{P}(M_{ij} = 1 - p_{ij}) = p_{ij}$  and  $\mathbb{P}(M_{ij} = -p_{ij}) = 1 - p_{ij}$ , and  $M_{ii} = 0$ . Suppose that  $\text{Var}[M_{ij}] \leq \sigma^2$  with  $\sigma^2 \geq C' \log n/n$  for a constant  $C'$ , then with high probability  $\|M\| \leq C\sigma\sqrt{n}$  for a constant  $C$ .*

*Proof.* If  $\sigma^2 \geq \frac{\log^7 n}{n}$ , then Theorem 8.4 in [1] implies that  $\|M\| \leq 3\sigma\sqrt{n}$  w.h.p. If  $C' \frac{\log n}{n} \leq \sigma^2 \leq \frac{\log^7 n}{n}$ , then Lemma 2 in [2] implies that  $\|M\| \leq C\sigma\sqrt{n}$  w.h.p. for some universal constant  $C$ .  $\square$

### 1.4 Proof of Theorem 4

We first claim that  $K(p-q) \leq c_2 \sqrt{Kp + qn}$  implies  $K(p-q) \leq c_2 \sqrt{2qn}$  under the assumption that  $K \leq n/2$  and  $qn \geq c_1 \log n$ . In fact, if  $Kp \leq qn$ , then the claim trivially holds. If  $Kp > qn$ , then  $q < Kp/n \leq p/2$ . It follows that

$$Kp/2 < K(p-q) \leq c_2 \sqrt{Kp + qn} \leq c_2 \sqrt{2Kp}.$$

Thus,  $Kp < 8c_2^2$  which contradicts the assumption that  $Kp > qn \geq c_1 \log n$ . Therefore,  $Kp > qn$  cannot hold. Hence, it suffices to show that if  $K(p-q) \leq c_2 \sqrt{2qn}$ , then  $Y^*$  is not an optimal solution of the convex program (6)–(8). We do this by showing that the optimality of  $Y^*$  implies  $K(p-q) > c_2 \sqrt{2qn}$ .

Let  $\mathbb{I}$  be the  $n \times n$  all-one matrix. Let  $\mathcal{R} := \text{support}(Y^*)$  and  $\mathcal{A} := \text{support}(A)$ . Recall that  $Y^* = KUU^\top$  is the singular value decomposition of  $Y^*$ , and the orthogonal projection onto the space  $T$  is given by  $\mathcal{P}_T(M) = UU^\top M + MUU^\top - UU^\top MUU^\top$ .

Consider the Lagrangian

$$L(Y; \lambda, \mu, F, G) := -\langle A, Y \rangle + \lambda (\|Y\|_* - \|Y^*\|_*) + \eta (\langle \mathbb{I}, Y \rangle - rK^2) - \langle F, Y \rangle + \langle G, Y - \mathbb{I} \rangle,$$

where  $\lambda \geq 0$ ,  $\eta \in \mathbb{R}$ ,  $F_{ij} \geq 0$  and  $G_{ij} \leq 0$ ,  $\forall i, j$  are the Lagrangian multipliers. Note that  $Y = \frac{rK^2}{n^2} \mathbb{I}$  is strictly feasible so strong duality holds by Slater's Theorem. By standard convex analysis, if  $Y = Y^*$  is an optimal solution, then there must exist some  $F, G$  and  $\lambda$  for which the following

KKT conditions hold:

$$\begin{aligned}
0 \in \frac{\partial L(Y; \lambda, \mu, F, G)}{\partial Y} \Big|_{Y=Y^*}, & \quad \left. \vphantom{\frac{\partial L(Y; \lambda, \mu, F, G)}{\partial Y}} \right\} \text{Stationary condition} \\
F_{ij} \geq 0, \forall (i, j), & \quad \left. \vphantom{F_{ij}} \right\} \text{Dual feasibility} \\
G_{ij} \geq 0, \forall (i, j), & \\
\lambda \geq 0, & \\
F_{ij} = 0, \forall (i, j) \in \mathcal{R}, & \quad \left. \vphantom{F_{ij}} \right\} \text{Complementary slackness} \\
G_{ij} = 0, \forall (i, j) \in \mathcal{R}^c. &
\end{aligned}$$

Recall that  $M \in \mathbb{R}^{n \times n}$  is a subgradient of  $\|X\|_*$  at  $X = Y^*$  if and only if  $\mathcal{P}_T(M) = UU^\top$  and  $\|\mathcal{P}_{T^\perp}(M)\| \leq 1$ . Let  $H = F - G$ ; the KKT conditions imply that there exist some  $\lambda, \eta, W$  and  $H$  obeying

$$A - \lambda(UU^\top + W) - \eta\mathbb{I} + H = 0, \quad (28)$$

$$\lambda \geq 0, \quad (29)$$

$$P_T W = 0, \quad (30)$$

$$\|W\| \leq 1, \quad (31)$$

$$H_{ij} \leq 0, \forall (i, j) \in \mathcal{R}, \quad (32)$$

$$H_{ij} \geq 0, \forall (i, j) \in \mathcal{R}^c. \quad (33)$$

Now observe that  $UU^\top WUU^\top = 0$  by (30). We left and right multiply (28) by  $UU^\top$  to obtain

$$\bar{A} - \lambda UU^\top - \eta\mathbb{I} + \bar{H} = 0,$$

where for any matrix  $X \in \mathbb{R}^{n \times n}$ ,  $\bar{X} := UU^\top XUU^\top$  is the matrix obtained by taking the average in each  $K \times K$  block of  $X$ . Consider the last display equation on entries in  $\mathcal{R}$  and  $\mathcal{R}^c$  respectively. Applying the Bernstein inequality (Theorem A.1) for each entry of  $\bar{A}_{ij}$ , we get that with high probability,

$$p - \frac{\lambda}{K} - \eta + \bar{H}_{ij} \geq -\frac{c_3 \sqrt{p(1-p) \log n}}{K} - \frac{c_4 \log n}{2K^2} \stackrel{(a)}{\geq} -\frac{\epsilon_0}{8}, \quad \forall (i, j) \in \mathcal{R} \quad (34)$$

$$q - \eta + \bar{H}_{ij} \leq \frac{c_3 \sqrt{q(1-q) \log n}}{K} + \frac{c_4 \log n}{2K^2} \stackrel{(b)}{\leq} \frac{\epsilon_0}{8}, \quad \forall (i, j) \in \mathcal{R}^c \quad (35)$$

for some constants  $c_3, c_4 > 0$ , where (a) and (b) follow from the assumption  $K \geq c_1 \sqrt{\log n}$  with  $c_1$  sufficiently large. Using (32) and (33), we get

$$q - \frac{\epsilon_0}{8} \leq q - \frac{c_3 \sqrt{q(1-q) \log n}}{K} - \frac{c_4 \log n}{2K^2} \leq \eta \leq p + \frac{c_3 \sqrt{p(1-p) \log n}}{K} + \frac{c_4 \log n}{2K^2} - \frac{\lambda}{K} \leq p + \frac{\epsilon_0}{8} - \frac{\lambda}{K}. \quad (36)$$

It follows that

$$\begin{aligned}
\lambda &\leq K(p - q) + c_3(\sqrt{p(1-p) \log n} + \sqrt{q(1-q) \log n}) + \frac{c_4 \log n}{K} \\
&\leq 4 \max \left\{ K(p - q), c_3 \sqrt{p(1-p) \log n}, c_3 \sqrt{q(1-q) \log n}, \frac{c_4 \sqrt{\log n}}{c_1} \right\}. \quad (37)
\end{aligned}$$

On the other hand, (31), (30) and (28) imply

$$\begin{aligned}\lambda^2 &= \left\| \lambda(UU^\top + W) \right\|^2 \geq \frac{1}{n} \left\| \lambda(UU^\top + W) \right\|_F^2 \\ &= \frac{1}{n} \|A - \eta \mathbb{I} + H\|_F^2 \geq \frac{1}{n} \|A_{\mathcal{R}^c} - \eta \mathbb{I}_{\mathcal{R}^c} + H_{\mathcal{R}^c}\|_F^2 \geq \frac{1}{n} \sum_{(i,j) \in \mathcal{R}^c} (1 - \eta)^2 A_{ij},\end{aligned}$$

where  $X_{\mathcal{R}^c}$  denotes that matrix obtained from  $X$  by setting the entries outside  $\mathcal{R}^c$  to zero. Using  $\eta \leq 1 - \frac{7}{8}\epsilon_0$ , which is a consequence of (36), (29) and the assumption  $p \leq 1 - \epsilon_0$ , we obtain

$$\lambda^2 \geq \frac{49}{64n} \epsilon_0^2 \sum_{(i,j) \in \mathcal{R}^c} A_{ij}, \quad (38)$$

Note that  $\sum_{(i,j) \in \mathcal{R}^c} A_{ij}$  equals two times the sum of  $\binom{n}{2} - r\binom{K}{2}$  i.i.d. Bernoulli random variables with parameter  $q$ . By the Chernoff bound of Binomial distributions and the assumption that  $qn \geq c_1 \log n$ , we know with high probability  $\sum_{(i,j) \in \mathcal{R}^c} A_{ij} \geq Cqn^2$  for some constant  $C$ . It follows from (38) that  $\lambda^2 \geq C'qn$  for some constant  $C' > 0$ . Combining with (37) and the assumption that  $qn \geq c_1 \log n$ , we conclude that  $K(p - q) \geq C''\sqrt{qn}$  for some constant  $C'' > 0$ . This completes the proof of the theorem.

## 1.5 Proof of Theorem 5

The degree  $d_i$  of node  $i$  is distributed as  $\text{Bin}(K - 1, p)$  plus an independent  $\text{Bin}(n - K, q)$  if  $i \in V_1$ . Otherwise  $d_i$  is distributed as  $\text{Bin}(n - 1, q)$  if  $i \in V_2$ . It follows that  $\mathbb{E}[d_i] = (n - 1)q + (K - 1)(p - q)$  if  $i \in V_1$  and  $\mathbb{E}[d_i] = (n - 1)q$  if  $i \in V_2$ . If we define  $\sigma^2 = Kp(1 - q) + nq(1 - q)$ , then we further have  $\text{Var}[d_i] \leq \sigma^2$ . Set  $t := (K - 1)|p - q|/2 \leq \sigma^2$ ; the Bernstein inequality (Theorem A.1) gives

$$\mathbb{P}\{|d_i - \mathbb{E}[d_i]| \geq t\} \leq 2 \exp\left(-\frac{t^2}{2\sigma^2 + 2t/3}\right) \leq 2 \exp\left(-\frac{(K - 1)^2(p - q)^2}{12\sigma^2}\right) \leq 2n^{-2},$$

where the last inequality follows from assumption (12). By the union bound, with probability at least  $1 - 2n^{-1}$ ,  $d_i > \frac{(p-q)K}{2} + qn$  for all nodes  $i \in V_1$  and  $d_i < \frac{(p-q)K}{2} + qn$  for all nodes  $i \in V_2$ . Therefore, all nodes in  $V_2$  are correctly declared to be isolated with high probability.

The number of common neighbors  $S_{ij}$  between the nodes  $i$  and  $j$  is distributed as  $\text{Bin}(K - 2, p^2)$  plus an independent  $\text{Bin}(n - K, q^2)$  if  $i$  and  $j$  are in the same cluster, and it is distributed as  $\text{Bin}(2(K - 1), pq)$  plus an independent  $\text{Bin}(n - 2K, q^2)$  if  $i$  and  $j$  are in different clusters. Hence,  $\mathbb{E}[S_{ij}]$  equals  $(K - 2)p^2 + (n - K)q^2$  if  $i$  and  $j$  are in the same cluster and  $2(K - 1)pq + (n - 2K)q^2$  otherwise. The difference in mean equals  $K(p - q)^2 - 2p(p - q)$ . Let  $\sigma^2 = 2Kp^2(1 - q^2) + nq^2(1 - q^2)$ . Then  $\text{Var}[S_{ij}] \leq \sigma^2$ . Set  $t' := K(p - q)^2/3 \leq \sigma^2$ . Assumption (13) implies that  $t' > 2p(p - q)$ . Applying the Bernstein inequality (Theorem A.1), we obtain

$$\mathbb{P}\{|S_{ij} - \mathbb{E}[S_{ij}]| \geq t'\} \leq 2 \exp\left(-\frac{t'^2}{2\sigma^2 + 2t'/3}\right) \leq 2 \exp\left(-\frac{K^2(p - q)^4}{27\sigma^2}\right) \leq 2n^{-3},$$

where the last inequality follows from the assumption (13). By union bound, with probability at least  $1 - 2n^{-1}$ ,  $S_{ij} > \frac{(p-q)^2K}{3} + 2Kpq + q^2n$  for all nodes  $i, j$  from the same cluster and  $S_{ij} < \frac{(p-q)^2K}{3} + 2Kpq + q^2n$  for all nodes  $i, j$  from two different clusters. Therefore the simple algorithm returns the true clusters w.h.p.

## 1.6 Proof of Theorem 6

For simplicity we assume  $K$  and  $n_2$  are even numbers. We partition  $V_1$  into two equal-sized subsets  $V_{1+}$  and  $V_{1-}$  such that half of the nodes of each cluster are in  $V_{1+}$ . Similarly,  $V_2$  is partitioned into two equal-sized subsets  $V_{2+}$  and  $V_{2-}$ . To prove the theorem, we need the following anti-concentration inequality.

**Theorem 1.4** (Theorem 7.3.1 in [3]). *Let  $X_1, \dots, X_n$  be independent random variables such that  $0 \leq X_i \leq 1$  for all  $i$ . Suppose  $X = \sum_{i=1}^n X_i$  and  $\sigma^2 := \sum_{i=1}^n \text{Var}[X_i] \geq 200$ . Then for all  $0 \leq t \leq \sigma^2/100$  and some universal constant  $c > 0$ , we have*

$$\mathbb{P}[X \geq \mathbb{E}[X] + t] \geq ce^{-t^2/(3\sigma^2)}.$$

**Identifying isolated nodes** For each node  $i$  in  $V_{1+} \cup V_{2+}$ , let  $d_{i+}$  be the number of its neighbors in  $V_{1+} \cup V_{2+}$  and  $d_{i-}$  be the number of its neighbors in  $V_{1-} \cup V_{2-}$ , so  $d_i = d_{i+} + d_{i-}$ . We consider two cases.

**Case 1:** Suppose  $(Kp + (n - K)q) \log n_1 \geq nq \log n_2$ . In this case we have  $(K - 1)^2(p - q)^2 \leq 2c_2(Kp + nq) \log n_1$  by (14). For each  $i \in V_{1+}$ ,  $d_{i-}$  is distributed as  $\text{Bin}(K/2, p)$  plus an independent  $\text{Bin}((n - K)/2, q)$ . Let  $t := (K - 1)(p - q) + 2$ ,  $\gamma_1 := \mathbb{E}[d_{i-}] - t = nq/2 + K(p - q)/2 - t$  and  $\sigma_d^2 := \text{Var}[d_{i-}] = \frac{1}{2}Kp(1 - p) + \frac{1}{2}(n - K)q(1 - q)$ . Since  $K \leq n/2$ ,  $p, q$  are bounded away from 1 and  $Kp + nq \geq Kp^2 + nq^2 \geq c_1 \log n$ , we have  $\sigma_d^2 \geq c' \log n \geq 200$ . Combining with (14), we further have  $\sigma_d^4 \geq c''K^2(p - q)^2 / \log n_1 \cdot c' \log n \geq 100t^2$ . We can thus apply Theorem 1.4 and get

$$\mathbb{P}[d_{i-} \leq \gamma_1] \geq c \exp\left(-\frac{t^2}{3\sigma_d^2}\right) = \exp\left(-\frac{((K - 1)(p - q) + 2)^2}{3(Kp(1 - p) + (n - K)q(1 - q))}\right) \geq cn_1^{-c'},$$

for some constant  $c' > 0$  that can be made small by choosing  $c_2$  above sufficiently small. Let  $i^* := \arg \min_{i \in V_{1+}} d_{i-}$ . Since the random variables  $\{d_{i-} : i \in V_{1+}\}$  are mutually independent, we have

$$\mathbb{P}[d_{i^*-} \geq \gamma_1] = \prod_{i \in V_{1+}} \mathbb{P}[d_{i-} \geq \gamma_1] \leq (1 - cn_1^{-c'})^{n_1/2} \leq \exp\left(-cn_1^{1-c'}/2\right) \leq 1/4.$$

On the other hand, for each  $i \in V_{1+}$ ,  $d_{i+}$  is distributed as  $\text{Bin}(K/2 - 1, p)$  plus an independent  $\text{Bin}((n - K)/2, q)$ . Since the median of  $\text{Bin}(n, p)$  is at most  $np + 1$ , we know that with probability at least  $1/2$ ,  $d_{i+} \leq \gamma_2 := nq/2 + K(p - q)/2 - p + 2$ . Now observe that the two sets of random variables  $\{d_{i+}, i \in V_{1+}\}$  and  $\{d_{i-}, i \in V_{1+}\}$  are independent of each other, so  $d_{i+}$  is independent of  $i^*$  for each  $i \in V_{1+}$ . It follows that

$$\mathbb{P}[d_{i^*+} \leq \gamma_2] = \sum_{i \in V_{1+}} \mathbb{P}[d_{i+} \leq \gamma_2 | i^* = i] \mathbb{P}[i^* = i] = \sum_{i \in V_{1+}} \mathbb{P}[d_{i+} \leq \gamma_2] \mathbb{P}[i^* = i] \geq \frac{1}{2}.$$

Combining the last two display equations by the union bound, we obtain that with probability at least  $1/4$ ,

$$d_{i^*} = d_{i^*-} + d_{i^*+} \leq \gamma_1 + \gamma_2 = (n - 1)q,$$

and thus node  $i^*$  will be incorrectly declared as an isolated node.

**Case 2:** Suppose  $(Kp + nq) \log n_1 \leq nq \log n_2$ . In this case we have  $(K - 1)^2(p - q)^2 \leq 2c_2nq \log n_2$  by assumption. Define  $i^* = \arg \max_{i \in V_{2+}} d_{i-}$ . Using the same argument as in Case 1, we can show that with probability at least  $1/4$ ,  $d_{i^*} \geq (n - 1)q + (K - 1)(p - q)$  and thus node  $i^*$  will be incorrectly declared as a non-isolated node.

**Recovering clusters** For two nodes  $i, j \in V_1$ , let  $S_{ij+}$  be the number of their common neighbors in  $V_{1+} \cup V_{2+}$  and  $S_{ij-}$  be the number of their common neighbors in  $V_{1-} \cup V_{2-}$ , so  $S_{ij} = S_{ij+} + S_{ij-}$ .

For each pair of nodes  $i, j$  in  $V_{1+}$  that are from the same cluster,  $S_{ij-}$  is distributed as  $\text{Bin}(K/2, p^2)$  plus an independent  $\text{Bin}((n-K)/2, q^2)$ . Let  $t' := K(p-q)^2 + 4$ ,  $\gamma_3 := \mathbb{E}[S_{ij-}] - t' = nq^2/2 + K(p^2 - q^2)/2 - t'$ , and  $\sigma_S^2 := \text{Var}[S_{ij-}] = \frac{1}{2}Kp^2(1-p^2) + \frac{1}{2}(n-K)q^2(1-q^2)$ . Since  $K \leq n/2$ ,  $p, q$  are bounded away from 1 and  $Kp^2 + nq^2 \geq c_1 \log n$ , we have that  $\sigma_S^2 \geq 200$  and  $\sigma_S^2 \geq 100t'$ . Theorem 1.4 implies that there exists a constant  $c > 0$  such that

$$\mathbb{P}[S_{ij-} \leq \gamma_3] \geq c \exp\left(-\frac{t'^2}{3\sigma_S^2}\right) = c \exp\left(-\frac{(K(p-q)^2 + 4)^2}{3(Kp^2(1-p^2) + (n-K)q^2(1-q^2))}\right) \geq cn_1^{-c'},$$

where the constant  $c' > 0$  can be made sufficiently small by choosing  $c_2$  sufficiently small in the statement of the lemma. Without loss of generality, we may re-label the nodes such that  $V_{1+} = \{1, 2, \dots, n_1/2\}$  and for each  $k = 1, \dots, n_1/4$ , the nodes  $2k-1$  and  $2k$  are in the same cluster. Note that the random variables  $\{S_{(2k-1)2k-} : k = 1, 2, \dots, n_1/4\}$  are mutually independent. Let  $i^* = -1 + 2 \arg \min_{k=1, 2, \dots, n_1/4} S_{(2k-1)2k-}$  and  $j^* = i^* + 1$ ; it follows that

$$\mathbb{P}[S_{i^*j^*-} \geq \gamma_3] \leq (1 - cn_1^{-c'})^{n_1/4} \leq \exp(-cn_1^{1-c'}/4) \leq 1/4.$$

On the other hand, since  $S_{ij+}$  is distributed as  $\text{Bin}(K/2 - 2, p^2)$  plus an independent  $\text{Bin}((n-K)/2, q^2)$ , we use the median argument to obtain that with probability at least  $1/2$ ,  $S_{ij+} \leq \gamma_4 := nq^2/2 + K(p^2 - q^2)/2 - 2p^2 + 2$ . Because  $\{S_{ij+}, i, j \in V_{1+}\}$  only depends on the edges between  $V_{1+}$  and  $V_{1+} \cup V_{2+}$ , and  $(i^*, j^*)$  only depends on the edges between  $V_{1+}$  and  $V_{1-} \cup V_{2-}$ , we know  $\{S_{ij+}, i, j \in V_{1+}\}$  and  $(i^*, j^*)$  are independent of each other. It follows that  $S_{i^*j^*+} \leq \gamma_4$  with probability at least  $1/2$ . It follows that with probability at least  $1/4$ ,

$$S_{i^*j^*} = S_{i^*j^*-} + S_{i^*j^*+} \leq \gamma_3 + \gamma_4 = 2(K-1)pq + (n-2K)q^2$$

and thus the nodes  $i^*, j^*$  will be incorrectly assigned to two different clusters.

## Appendices

### A Standard Bernstein Inequality

**Theorem A.1.** *Let  $X_1, \dots, X_n$  be independent random variables such that  $|X_i| \leq M$  almost surely. Let  $\sigma^2 = \sum_{i=1}^n \text{Var}(X_i)$ , then for any  $t \geq 0$*

$$\mathbb{P}\left[\sum_{i=1}^n X_i \geq t\right] \leq \exp\left(\frac{-t^2}{2\sigma^2 + \frac{2}{3}Mt}\right).$$

*A consequent of the above inequality is  $\mathbb{P}\left[\sum_{i=1}^n X_i \geq \sqrt{2\sigma^2 u} + \frac{2Mu}{3}\right] \leq e^{-u}$  for any  $u > 0$ .*

## References

- [1] S. Chattergee. Matrix estimation by universal singular value thresholding. *arxiv:1212.1247*, 2012.
- [2] L. Massoulié and D.-C. Tomozei. Distributed user profiling via spectral methods. *arxiv:1109.3318*, 2011.
- [3] J. Matoušek and J. Vondrák. The probabilistic method, lecture notes. <http://kam.mff.cuni.cz/~matousek/prob-ln-2pp.ps.gz>, 2008.
- [4] K. Rohe, S. Chatterjee, and B. Yu. Spectral clustering and the high-dimensional stochastic blockmodel. *The Annals of Statistics*, 39(4), 2011.
- [5] J. Tropp. User-friendly tail bounds for sums of random matrices. *Foundations of Computational Mathematics*, 12(4):389–434, 2012.
